# Supplementary material for: Exploring Feedback Mechanics during Experiential Learning in Pharmacy Education: A Scoping Review
Source: MDPI journal article supplement (doi:10.3390/pharmacy12030074), 2024-05-07
Supplement: s1 [file s1]

## Supplementary Materials

**Table S1.** Search strategy for PubMed

| Search number | Query                                                                                                                                                                                                                                                                                                                                                              | Results |
|---------------|--------------------------------------------------------------------------------------------------------------------------------------------------------------------------------------------------------------------------------------------------------------------------------------------------------------------------------------------------------------------|---------|
| 4             | ((Pharmacy student OR PharmD student OR pharmacy resident OR pharmacy fellow OR pharmacy trainee OR Bpharm OR MPharm) AND (Feedback OR Formative feedback)) AND (Experiential education OR experiential teaching OR clinical rotation OR internship OR residency OR fellowship OR bedside teaching OR clerkship OR clinical clerkship OR workplace based learning) | 387     |
| 3             | Experiential education OR experiential teaching OR clinical rotation OR internship OR residency OR fellowship OR bedside teaching OR clerkship OR clinical clerkship OR workplace-based learning                                                                                                                                                                   | 535,735 |
| 2             | Feedback OR Formative feedback                                                                                                                                                                                                                                                                                                                                     | 194,420 |
| 1             | Pharmacy student OR PharmD student OR pharmacy resident OR pharmacy fellow OR pharmacy trainee OR Bpharm OR MPharm                                                                                                                                                                                                                                                 | 28,807  |

**Table S2.** Search strategy for Web of Science.

| Search number | Query                                                                                                                                                                                                         | Results   |
|---------------|---------------------------------------------------------------------------------------------------------------------------------------------------------------------------------------------------------------|-----------|
| 4             | (#1) AND (#2) AND (#3)                                                                                                                                                                                        | 248       |
| 3             | Experiential education OR experiential teaching OR clinical rotation OR internship OR residency OR fellowship OR bedside teaching OR clerkship OR clinical clerkship OR workplace-based learning (All Fields) | 1,231,159 |
| 2             | Feedback OR Formative feedback (All Fields)                                                                                                                                                                   | 642,719   |
| 1             | Pharmacy student OR PharmD student OR pharmacy resident OR pharmacy fellow OR pharmacy trainee OR Bpharm OR MPharm (All Fields)                                                                               | 30781     |

**Table S3.** Search strategy for Embase.

| Search number | Query                                                                                                                                                                                                                                                                                                                                                                                                                                                                                                                                                                                                                                                                           | Results |
|---------------|---------------------------------------------------------------------------------------------------------------------------------------------------------------------------------------------------------------------------------------------------------------------------------------------------------------------------------------------------------------------------------------------------------------------------------------------------------------------------------------------------------------------------------------------------------------------------------------------------------------------------------------------------------------------------------|---------|
| 3             | ('pharmacy student'/exp OR 'pharmacy student' OR<br>(('pharmacy'/exp OR pharmacy) AND ('student'/exp<br>OR student)) OR 'pharmd student' OR (pharmd AND<br>('student'/exp OR student)) OR (('pharmacy'/exp<br>OR pharmacy) AND resident*) OR (('pharmacy'/exp<br>OR pharmacy) AND fellow*) OR (('pharmacy'/exp<br>OR pharmacy) AND trainee*) OR bpharm OR mpharm)<br>AND (feedback OR (formative AND feedback)) AND<br>(experiential AND education OR<br>(experiential AND teaching) OR (clinical AND rotation)<br>OR internship OR residency OR fellowship* OR<br>(bedside AND teaching) OR clerkship OR<br>(clinical AND clerkship) OR<br>(workplace AND based AND learning)) | 438     |
| 2             | ('pharmacy student'/exp OR 'pharmacy student' OR<br>(('pharmacy'/exp OR pharmacy) AND ('student'/exp<br>OR student)) OR 'pharmd student' OR (pharmd AND<br>('student'/exp OR student)) OR (('pharmacy'/exp<br>OR pharmacy) AND resident*) OR (('pharmacy'/exp<br>OR pharmacy) AND fellow*) OR (('pharmacy'/exp<br>OR pharmacy) AND trainee*) OR bpharm OR mpharm)<br>AND (feedback OR (formative AND feedback))                                                                                                                                                                                                                                                                 | 1,952   |
| 1             | 'pharmacy student'/exp OR 'pharmacy student' OR<br>(('pharmacy'/exp OR pharmacy) AND ('student'/exp<br>OR student)) OR 'pharmd student' OR (pharmd AND<br>('student'/exp OR student)) OR (('pharmacy'/exp<br>OR pharmacy) AND resident*) OR (('pharmacy'/exp<br>OR pharmacy) AND fellow*) OR (('pharmacy'/exp<br>OR pharmacy) AND trainee*) OR bpharm OR mpharm                                                                                                                                                                                                                                                                                                                 | 38,540  |

**Table S4.** Search strategy for Academic Search Ultimate (EBSCO).

| Search number | Query                                                                                                                                                                                                                                                                                                                                                                  | Results |
|---------------|------------------------------------------------------------------------------------------------------------------------------------------------------------------------------------------------------------------------------------------------------------------------------------------------------------------------------------------------------------------------|---------|
| 4             | ( Experiential education OR experiential teaching OR clinical rotation OR internship OR residency OR fellowship OR bedside teaching OR clerkship OR clinical clerkship OR workplace based learning ) AND ( Feedback OR Formative feedback ) AND ( Pharmacy student OR PharmD student OR pharmacy resident OR pharmacy fellow OR pharmacy trainee OR Bpharm OR MPharm ) | 69      |
| 3             | Experiential education OR experiential teaching OR clinical rotation OR internship OR residency OR fellowship OR bedside teaching OR clerkship OR clinical clerkship OR workplace-based learning                                                                                                                                                                       | 114,764 |
| 2             | Feedback OR Formative feedback                                                                                                                                                                                                                                                                                                                                         | 215,530 |
| 1             | Pharmacy student OR PharmD student OR pharmacy resident OR pharmacy fellow OR pharmacy trainee OR Bpharm OR MPharm                                                                                                                                                                                                                                                     | 6099    |

**Table S5.** Search strategy for EBSCO (ERIC).

| Search number | Query                                                                                                                                                                                                                                                                                                                                           | Results |
|---------------|-------------------------------------------------------------------------------------------------------------------------------------------------------------------------------------------------------------------------------------------------------------------------------------------------------------------------------------------------|---------|
| 3             | (pharmacy student OR pharmd student OR pharmd OR resident OR fellow OR trainee OR bpharm OR mpharm) AND (feedback OR formative feedback) AND (experiential education OR experiential teaching OR clinical rotation OR internship OR residency OR fellowship OR bedside teaching OR clerkship OR clinical clerkship OR workplace based learning) | 130     |
| 2             | (pharmacy student OR pharmd student OR pharmd OR resident OR fellow OR trainee OR bpharm OR mpharm) AND (feedback OR formative feedback)                                                                                                                                                                                                        | 983     |
| 1             | pharmacy student OR pharmd student OR pharmd OR resident OR fellow OR trainee OR bpharm OR mpharm                                                                                                                                                                                                                                               | 26,172  |

**Table S6.** Search strategy for ProQuest Central.

| Search number | Query                                                                                                                                                                                                                                                                                                                                                                                 | Results |
|---------------|---------------------------------------------------------------------------------------------------------------------------------------------------------------------------------------------------------------------------------------------------------------------------------------------------------------------------------------------------------------------------------------|---------|
| 4             | ( Experiential education OR experiential teaching OR clinical rotation OR internship OR residency OR fellowship OR bedside teaching OR clerkship OR clinical clerkship OR workplace based learning ) AND ( Feedback OR Formative feedback ) AND ( Pharmacy student OR PharmD student OR pharmacy resident OR pharmacy fellow OR pharmacy trainee OR Bpharm OR MPharm ) =abstract only | 71      |
| 3             | Experiential education OR experiential teaching OR clinical rotation OR internship OR residency OR fellowship OR bedside teaching OR clerkship OR clinical clerkship OR workplace-based learning                                                                                                                                                                                      | 1061764 |
| 2             | Feedback OR Formative feedback                                                                                                                                                                                                                                                                                                                                                        | 1354307 |
| 1             | Pharmacy student OR PharmD student OR pharmacy resident OR pharmacy fellow OR pharmacy trainee OR Bpharm OR MPharm                                                                                                                                                                                                                                                                    | 137188  |
